# Supplementary material
Source: PubMed Central journal article supplement (PMC3093498)
Supplement: 1018707108_Appendix.pdf [file 1018707108_Appendix.pdf]

## A Study of the Accuracy and Reliability of Forensic Latent Fingerprint Decisions Appendix: Supporting Information

|     |                                                                   |    |
|-----|-------------------------------------------------------------------|----|
| 1   | Materials and Methods .....                                       | 1  |
| 1.1 | Participants.....                                                 | 1  |
| 1.2 | Study description .....                                           | 2  |
| 1.3 | Fingerprint data.....                                             | 3  |
| 1.4 | Participant background survey responses .....                     | 5  |
| 1.5 | Instructions to participants .....                                | 10 |
| 2   | Decision rates .....                                              | 13 |
| 2.1 | Confidence intervals .....                                        | 13 |
| 2.2 | Distributions.....                                                | 13 |
| 3   | Individual examiner error and success rates .....                 | 14 |
| 4   | False positives.....                                              | 14 |
| 5   | Correlations between experience and examiner performance .....    | 15 |
| 6   | Correlations between certification and examiner performance ..... | 16 |
| 7   | Variability in test results.....                                  | 17 |
| 8   | Examiner consensus.....                                           | 20 |
| 9   | Positive and negative predictive values .....                     | 21 |
| 10  | Exclusion decisions .....                                         | 21 |
| 11  | Verification of exclusions.....                                   | 23 |
| 12  | Glossary/Acronyms .....                                           | 24 |

---

### 1 Materials and Methods

#### 1.1 Participants

Participation in this study was open to all practicing latent print examiners. Participation was solicited at the 2009 International Association for Identification (IAI) International Educational Conference, at SWGFAST, and by direct contact with various forensic organizations, some of which encouraged or required participation by their latent print examiners. A total of 169 latent print examiners participated; all volunteers were accepted. More examiners and organizations indicated interest in the study than actually participated and provided results, generally citing time constraints as the reason: 66.5% of those who indicated interest completed the test. Three of the participants sent in partial results; these examiners were not included in the analysis.

Although the participants were not randomly selected, the study successfully included a diverse participant group with respect to organization, training history, level of experience, and other factors. The latent print examiners were generally highly experienced: median experience was 10 years, and 83% were certified as latent print examiners. The impact of years of experience and certification on performance is discussed in SI-5 and SI-6.

The participants completed a background survey, the responses from which were used to assess experience and to understand the latent print examiners' standard operating procedures used in casework (see SI-1.4). Of the responding participants, 49% were certified as latent print examiners by the IAI, an additional 33% were certified by their employers or other organizations, and 18% were uncertified (Survey question #13). Forty-eight percent of the participants were employed by U.S. federal agencies, 23% by state agencies, 21% by local agencies, 7% by private organizations, and 1% by non-U.S. organizations (Survey question #4). The median amount of experience as a latent print examiner was 10 years (Survey question #9).

Six participants reported having made an erroneous individualization after training: one on a proficiency test; four on casework, detected during verification; one on casework, detected after reporting (Survey question #24). Fifty-four participants reported having made an erroneous exclusion after training: four on a proficiency test; forty-three on casework, detected during verification; ten on casework, detected after reporting; three examiners noted erroneous exclusions in two categories (Survey question #25).

---

## **1.2 Study description**

Noblis developed custom, interactive software for this study that presented latent and exemplar fingerprint images, provided limited image processing capabilities, and recorded test responses. Image processing capabilities were deliberately limited in order to prevent differences in image processing skills from contributing substantially to examiner variability in the outcomes. The tests were distributed to participants on DVDs. Each participant was assigned a unique identifier, which was associated with a randomized sequence of image comparisons and was used to anonymize results. A set of practice data was included so that participants could become familiar with the software and procedures before starting the test itself.

Participants were instructed that the computer screen must accurately display the images presented by the software, and the software included a check for that purpose. The test environment was not controlled. Participants were given several weeks to complete the test, but there were not specific time requirements. They spent a median of 8 total hours on the test, over multiple sittings. Participants were not told what proportion of the image pairs were mated, nor was any feedback on the correctness of responses provided during the test. Participants were instructed that it was imperative that they conduct their analyses and comparisons in this study with the same diligence that they would use in performing casework. Participants were fully aware that they were participating in a study. Some may have been highly motivated to perform well in light of recent controversies concerning the accuracy of fingerprint identification, while others may not have taken the test as seriously as casework. The majority of the participants were volunteers, but some were encouraged or required by their employer/management to participate. We do not know the extent to which such factors may have altered performance. Motivational factors may have improved or worsened individual performance, or simply shifted their decision thresholds to be more or less conservative on borderline decisions.

For each image pair, the latent was presented for analysis, and the examiner was asked if the image was of value for individualization (VID); if the image was not VID, the examiner was asked if the image was of value for exclusion only (VEO); if the image was not VEO, the image was considered no value (NV). If the latent was NV, the exemplar was not presented for comparison; otherwise, the exemplar was presented and the examiner was required to make a decision of individualization, exclusion, or inconclusive. The specific wording used in the test and instructions is included in SI-1.5. The comparison decision corresponds directly to SWGFAST guidelines (1). The VEO decision is used operationally by a minority of participants (Survey question #29). Three questions were asked to provide additional insight into the examiner decisions: explanation of exclusion decisions, explanation of inconclusive decisions, and comparison difficulty. The inconclusive categorizations are in the forthcoming ANSI/NIST ITL-1 2011 standard (2). The categories for exclusions are based on the process for exclusion defined in the SWGFAST draft standards for conclusions (3): one can exclude on ridge flow alone, or sometimes must revert to level 2/3 detail. Examiners were able to review and correct their responses before proceeding to the next comparison, but could not revisit previous comparisons, or skip comparisons and return to them later. Examiners were also able to leave comments associated with specific test responses. All such comments were reviewed; a few data entry errors were excluded based on these comments.

The test was distributed to participants in multiple iterations. All testing was conducted in July-December 2009. An early version of the software used in 4% of the comparisons had intermittent image display problems. We found no indication that the display problems increased error rates or decreased conclusion rates. Early versions of the software used in 26% of the comparisons did not provide a final review of responses for each image pair; for those comparisons we cannot exclude the possibility of an undetected data entry error, although all comments were reviewed, and the few comparisons with comments that indicated data entry errors were excluded.

Prior to the tests, a pilot study was conducted to evaluate the test software prototype and to provide sizing information for the statistical design; the results of the pilot study are not included in our analysis. A repeatability test is in progress at the time of this writing.

Anonymity was part of the Institutional Review Board for Human Subject Research approval for this study. Participants were assured that

*“Results will be anonymous. A blind coding system will ensure anonymity: participants receive a subject ID number from the study facilitator (at FBI Lab); the data sent by the study facilitator to the analysis team (at Noblis) only*

*contains the subject ID number (not name or affiliation); the analysis team associates the subject ID with an anonymized code; the data and interpretation is based solely on the anonymized code; cross-references between the subject IDs and the anonymized codes will be destroyed after completion of the research. Therefore, the identities of participants will not be associated with the results at any point during analysis, and such association will not be possible subsequently, such as for discovery. The background survey does not request participants' names, employer, or any other personally identifying information. Reporting: Results will be aggregated across multiple examiners, based on categories of experience established in the background questionnaire. As noted, results will be anonymous; care will be taken so that the results are not aggregated in a way that compromises anonymity."*

### **1.3 Fingerprint data**

The fingerprints for the study were collected at the FBI Laboratory and at Noblis under controlled conditions to guarantee that the true mate relationships were known with certainty. The collection of fingerprint data from human subjects was approved by the FBI Institutional Review Board and the Noblis Institutional Review Board. Use of examiners in the study was approved by the FBI Institutional Review Board. Informed consent was obtained from all subjects. The overall fingerprint dataset included approximately 1,000 latents and an average of 13 exemplar impressions per finger position. Latents were captured electronically at 8-bit grayscale, uncompressed, at a resolution of 1,000 pixels per inch. Porous materials were processed using ninhydrin or physical developer, and were scanned using flatbed scanners. Latents on non-porous materials were processed using cyanoacrylate and light gray powder (captured using digital cameras), or using black powder, with lift cards scanned using flatbed scanners. The processing methods are summarized in Table S1. The exemplars included rolled and plain impressions, and were captured as inked prints on paper cards or using FBI-certified livescan devices; exemplars were 8-bit grayscale, 1,000 or 500 pixels per inch, and either uncompressed or compressed using Wavelet Scalar Quantization (4).

| Processing method                    | Count | %   |
|--------------------------------------|-------|-----|
| Black powder                         | 126   | 35% |
| Ninhydrin                            | 118   | 33% |
| Physical developer                   | 55    | 15% |
| Cyanoacrylate with light gray powder | 57    | 16% |

Table S1: Distribution of processing methods for the 356 latents.

| Deposition method | Count | %   |
|-------------------|-------|-----|
| Touch             | 166   | 47% |
| Roll              | 57    | 16% |
| Slide             | 45    | 13% |
| Twist             | 42    | 12% |
| (not recorded)    | 46    | 13% |

Table S2: Distribution of deposition method for the 356 latents. Deposition method describes the motion with which the latent was deposited.

The latents and mated exemplars for the study were selected from the overall fingerprint dataset by subject matter experts to include a range of characteristics and quality, to be broadly representative of prints encountered in casework (Table S3). The term “broadly representative” is used because while any of the individual images could have been examples taken from casework, the overall distribution of the fingerprint data cannot as a whole be considered as statistically representative of operational data. The exemplar data included a larger proportion of poor-quality exemplars than is representative of operational IAFIS data, based on the NIST Fingerprint Image Quality (NFIQ) metric (5, Table S4). NFIQ was developed specifically to predict the likelihood that an exemplar will be correctly matched in an image-based search of a large-scale ten-print exemplar AFIS. NFIQ is used operationally in the U.S. Department of Homeland Security’s US-VISIT IDENT system, and in the FBI’s IAFIS system. There is no analogous means of comparing the latent data to operational casework: the difficulty and attributes of latents used in casework vary significantly among organizations, and nascent quality metrics have not been used to characterize operational casework. The data used in the study included many latents of relatively low quality, specifically to evaluate the consensus among examiners in making value decisions.

| <b>Overall, are the latent prints in the Black Box study representative of your casework?</b>                 |    |     |
|---------------------------------------------------------------------------------------------------------------|----|-----|
| Strongly Agree                                                                                                | 12 | 17% |
| Agree                                                                                                         | 47 | 66% |
| Disagree                                                                                                      | 9  | 13% |
| Strongly Disagree                                                                                             | 3  | 4%  |
| <b>Overall, are the exemplar prints (knowns) in the Black Box study representative of your casework?</b>      |    |     |
| Strongly Agree                                                                                                | 11 | 15% |
| Agree                                                                                                         | 42 | 59% |
| Disagree                                                                                                      | 15 | 21% |
| Strongly Disagree                                                                                             | 3  | 4%  |
| <b>How does the overall difficulty of the comparisons in the Black Box study correspond to your casework?</b> |    |     |
| Easier                                                                                                        | 6  | 8%  |
| Similar                                                                                                       | 60 | 85% |
| Harder                                                                                                        | 5  | 7%  |

Table S3: Participant responses to three questions regarding how the Black Box data corresponded to actual casework. 71 of the participants responded; this group under-represented U.S. federal employees.

| <b>NFIQ</b> | <b>Black Box exemplars</b> | <b>Operational IAFIS exemplars</b> |
|-------------|----------------------------|------------------------------------|
| 1 (Good)    | 24.9%                      | 35.7%                              |
| 2           | 12.1%                      | 29.6%                              |
| 3           | 28.8%                      | 18.5%                              |
| 4           | 13.0%                      | 7.2%                               |
| 5 (Poor)    | 21.1%                      | 8.8%                               |

Table S4: Comparison of Black Box exemplar quality to operational IAFIS exemplar quality, using the NIST Fingerprint Image Quality (NFIQ) metric. Operational IAFIS data is based on 13,709,420 criminal arrest transactions received prior to April 2010. Black box exemplars include a greater proportion of lower quality images (NFIQ={3,4,5}) than the operational IAFIS data: 62.9% of black box exemplars correspond to the worst 34.5% of operational IAFIS exemplars. Values are averages of all 10 finger positions.

The fingerprint data included 356 latents, from 165 distinct fingers of 21 distinct subjects; and 484 exemplars. These were combined to form 744 distinct image pairs, with each pair including one latent and one exemplar. There were 520 mated pairs and 224 non-mated pairs.

The proportion of mated to non-mated pairs reflects the desire to achieve an approximate balance in the number of comparisons performed on mated and non-mated pairs, and the desire for a large variety of image pairs, limited by the difficulty of selecting challenging non-mated pairs. The test set included more mated pairs to compensate for the higher proportion of poor quality latents among the mated pairs: while 70% of the image pairs were mated (68% of presentations), 59% of the resulting VID comparisons were of mated pairs. No proportion of mated to non-mated pairs would be representative of all situations: the actual base rate for casework can be assumed to vary between agencies and by the type of case.

Prints to be compared were selected for difficulty. Mated pairs were selected at random from the latents and exemplars just described, which were both disproportionately poor quality. The selection of non-mated pairs was designed to yield difficult comparisons comparable to those resulting from searches of the FBI’s Integrated AFIS (IAFIS). At the time of data collection, IAFIS included exemplars from over 58 million persons with criminal records, or 580 million distinct fingers; the size of the IAFIS database continues to grow. For each latent, one of the corresponding exemplars was cropped to correspond to the portion of the print visible in the latent, and then searched against IAFIS as an image-based search (no human markup). The cropped exemplar was used solely to enable the search and was not used in the test. The cropped exemplar searches were conducted as image-based searches (“LFIS”), limited by finger position and pattern classifications in cases where classification was unambiguous. This approach was chosen, instead of searching the latents with marked features, to increase the likelihood that the non-mated candidates would be similar to the actual fingerprint, not just to the features marked in the latent. When a latent is used to search IAFIS, a list of twenty candidate exemplars is returned by default. Approximately one-

half of the non-mated pairs were selected by an experienced latent print examiner, who was not a participant, using one of two processes with the objective of maximizing the difficulty of comparisons: either the examiner selected from the twenty candidates returned by IAFIS the exemplar that would result in the most difficult comparison (18%), or the examiner selected an exemplar from the neighboring fingers from the correct subject (29%).\* For the remainder of the non-mated pairs, the first exemplar in the list of IAFIS candidates was selected. The process of selecting challenging non-mated pairs was time-consuming and therefore was not pursued for latents that were considered to be of no value by the subject matter experts doing data selection; as a result of this, the latents in mated pairs included a greater proportion of poor-quality latents than did the non-mated pairs.

Each of the 169 examiners was initially assigned 100 image pairs. Of these 16,900 presentations, 27 were either not administered (due to inadvertent duplicate assignments excluded prior to the test) or identified by the examiner as data entry errors during the test (via a comment facility built into the test software). Some of the examiners participated in a follow-on test (a repeatability study, manuscript in preparation), which included a small number of comparable, randomized assignments; 248 test responses (from 42 examiners) from that test were included in this analysis, for a total of 17,121 presentations. Distributions with respect to latents, image pairs, and examiners are shown in SI-2.2.

After test results were received, image pairs resulting in false positive or false negative errors were reviewed as an additional check that there were no data integrity errors in the ground-truth mating of the test data; ancillary information was used in this process, including review of the multiple impressions taken at each encounter during collection of the fingerprints used in the test. All false positive errors were reviewed, as well as false negative errors on image pairs for which no examiner made an individualization decision.

#### **1.4 Participant background survey responses**

Survey responses were provided by 159 of the 169 examiners; percentages in the summary below are based on a total of 159 unless otherwise indicated.

Despite the wide variety of experience among the participants, analyses of the survey data yielded few explanations for the observed differences in examiner performance. The survey variables were highly confounded (e.g., years of experience, gender, and education were all strongly associated, with years of experience inversely related to level of education), and statistical power was limited by uneven subpopulation sizes and modest differences in outcomes among the subpopulations. Notable results with respect to certification and experience are presented in SI-5 and SI-6.

#### **Demographics**

|                                                                          | <i>Count</i> | <i>Percent</i> |
|--------------------------------------------------------------------------|--------------|----------------|
| <b>1. Sex</b>                                                            |              |                |
| Female                                                                   | 76           | 48%            |
| Male                                                                     | 83           | 52%            |
| <b>2. Age</b>                                                            |              |                |
| 20-29                                                                    | 22           | 14%            |
| 30-39                                                                    | 59           | 37%            |
| 40-49                                                                    | 27           | 17%            |
| 50-59                                                                    | 37           | 23%            |
| 60-69                                                                    | 10           | 6%             |
| 70-79                                                                    | 1            | 1%             |
| No response                                                              | 3            | 2%             |
| <i>Minimum: 24; Median: 39; Maximum: 70; Mean: 41.8; St. Dev.: 11.3.</i> |              |                |

\* An individualization of an incorrect finger from the correct subject is an error. Neighboring index, middle, or ring fingers from a subject often have similar fingerprint pattern classifications and therefore are more likely to be similar than two random fingerprints.

|                                               | Count | Percent |
|-----------------------------------------------|-------|---------|
| <b>3. Highest level of education achieved</b> |       |         |
| Less than High School Diploma                 | 0     | 0%      |
| High School Diploma/GED                       | 7     | 4%      |
| Associate Degree/some college                 | 34    | 21%     |
| Bachelor's degree                             | 79    | 50%     |
| Graduate degree/Professional degree           | 39    | 25%     |

### Employer

|                                                                                                                                                   |     |     |
|---------------------------------------------------------------------------------------------------------------------------------------------------|-----|-----|
| <b>4. Current employment</b>                                                                                                                      |     |     |
| Non-U.S. National Gov't.                                                                                                                          | 0   | 0%  |
| Non-U.S. State/Province/Regional Gov't.                                                                                                           | 0   | 0%  |
| Non-U.S. City/Local Gov't                                                                                                                         | 0   | 0%  |
| Non-U.S. Private sector (non-Gov't.)                                                                                                              | 2   | 1%  |
| U.S. Federal Gov't.                                                                                                                               | 77  | 48% |
| U.S. State Gov't.                                                                                                                                 | 36  | 23% |
| U.S. City/County Gov't                                                                                                                            | 33  | 21% |
| U.S. Private sector (non-Gov't.)                                                                                                                  | 11  | 7%  |
| <b>5. National affiliation of employer (only if non-US)</b>                                                                                       |     |     |
| No response                                                                                                                                       | 154 | 97% |
| Invalid responses                                                                                                                                 | 5   | 3%  |
| <b>6. Has your agency received accreditation in latent prints?</b>                                                                                |     |     |
| Don't know                                                                                                                                        | 3   | 2%  |
| No                                                                                                                                                | 24  | 15% |
| Yes (for example by ASCLD/LAB (American Society of Crime Laboratory Directors/Laboratory Accreditation Board) or FQS (Forensic Quality Services)) | 132 | 83% |

### Experience

|                                                                                              |     |     |
|----------------------------------------------------------------------------------------------|-----|-----|
| <b>7. Total number of years employed as a 10-print examiner (Note: 10-print, not latent)</b> |     |     |
| Less than 5                                                                                  | 25  | 16% |
| 5-9                                                                                          | 20  | 13% |
| 10-19                                                                                        | 6   | 4%  |
| 20-29                                                                                        | 6   | 4%  |
| 30-39                                                                                        | 1   | 1%  |
| 40-49                                                                                        | 1   | 1%  |
| None (80 reported 0 years; 20 no responses)                                                  | 100 | 63% |
| <i>Minimum: 0.5; Median: 5; Maximum: 43; Mean: 7.8; St. Dev.: 8.2.</i>                       |     |     |
| <b>8. How long was your 10-print training? (Note: 10-print, not latent training)</b>         |     |     |
| None                                                                                         | 80  | 50% |
| Under 6 months                                                                               | 49  | 31% |
| 6 months - 1 year                                                                            | 23  | 14% |
| 1 or more years                                                                              | 7   | 4%  |

|                                                                                                                                                                                                                                                                                                                                                                                                  | Count | Percent |
|--------------------------------------------------------------------------------------------------------------------------------------------------------------------------------------------------------------------------------------------------------------------------------------------------------------------------------------------------------------------------------------------------|-------|---------|
| <b>9. Number of years employed as a latent examiner</b>                                                                                                                                                                                                                                                                                                                                          |       |         |
| Less than 5                                                                                                                                                                                                                                                                                                                                                                                      | 33    | 21%     |
| 5-9                                                                                                                                                                                                                                                                                                                                                                                              | 44    | 28%     |
| 10-19                                                                                                                                                                                                                                                                                                                                                                                            | 38    | 24%     |
| 20-29                                                                                                                                                                                                                                                                                                                                                                                            | 27    | 17%     |
| 30-39                                                                                                                                                                                                                                                                                                                                                                                            | 13    | 8%      |
| 40-49                                                                                                                                                                                                                                                                                                                                                                                            | 2     | 1%      |
| No response                                                                                                                                                                                                                                                                                                                                                                                      | 2     | 1%      |
| <i>Minimum: 0.25; Median: 10; Maximum: 44; Mean: 13; St. Dev.: 10.4.</i>                                                                                                                                                                                                                                                                                                                         |       |         |
| <b>10. Type of latent training received (Check all that apply - may add to over 100%)</b>                                                                                                                                                                                                                                                                                                        |       |         |
| No response                                                                                                                                                                                                                                                                                                                                                                                      | 1     | 1%      |
| Formal program of instruction                                                                                                                                                                                                                                                                                                                                                                    | 117   | 74%     |
| Informal training (on the job, apprenticeship)                                                                                                                                                                                                                                                                                                                                                   | 90    | 57%     |
| Limited formal training (courses, workshops)                                                                                                                                                                                                                                                                                                                                                     | 88    | 55%     |
| <b>11. How long was your total latent training (including initial and continuing, formal and on-the-job)?</b>                                                                                                                                                                                                                                                                                    |       |         |
| Under 6 months                                                                                                                                                                                                                                                                                                                                                                                   | 8     | 5%      |
| 6 months - 1 year                                                                                                                                                                                                                                                                                                                                                                                | 21    | 13%     |
| 1 or more years                                                                                                                                                                                                                                                                                                                                                                                  | 130   | 82%     |
| <b>12. Who provided your training? (Check all that apply - may add to over 100%)</b>                                                                                                                                                                                                                                                                                                             |       |         |
| No response                                                                                                                                                                                                                                                                                                                                                                                      | 1     | 1%      |
| An agency other than my employer at the time of my training                                                                                                                                                                                                                                                                                                                                      | 41    | 26%     |
| The agency I was/am employed with at the time of my training                                                                                                                                                                                                                                                                                                                                     | 150   | 94%     |
| Other                                                                                                                                                                                                                                                                                                                                                                                            | 22    | 14%     |
| Private organization                                                                                                                                                                                                                                                                                                                                                                             | 41    | 26%     |
| <b>13. Have you been certified by a certifying authority? (Check all that apply - may add to over 100%)</b>                                                                                                                                                                                                                                                                                      |       |         |
| No response (i.e., not certified)                                                                                                                                                                                                                                                                                                                                                                | 27    | 17%     |
| A current or previous accredited employer                                                                                                                                                                                                                                                                                                                                                        | 72    | 45%     |
| International Association for Identification (IAI) Latent certification (CLPE)                                                                                                                                                                                                                                                                                                                   | 78    | 48%     |
| International Association for Identification (IAI) Tenprint certification (CTPE)                                                                                                                                                                                                                                                                                                                 | 2     | 1%      |
| A current or previous non-accredited employer                                                                                                                                                                                                                                                                                                                                                    | 3     | 2%      |
| National certification (non-US only)                                                                                                                                                                                                                                                                                                                                                             | 1     | 1%      |
| <i>On question 13, responses were available for 161 of the participants (as opposed to 159 for all of the other questions), and therefore percentages are based on a total of 161; 18 of the IAI CLPE-certified examiners also indicated one or more of the other certifications (11%), among other combinations of certifications. Both of the examiners who indicated CTPE were also CLPE.</i> |       |         |
| <b>14. Are your certifications current/active?</b>                                                                                                                                                                                                                                                                                                                                               |       |         |
| Never certified                                                                                                                                                                                                                                                                                                                                                                                  | 26    | 16%     |
| No                                                                                                                                                                                                                                                                                                                                                                                               | 1     | 1%      |
| Yes                                                                                                                                                                                                                                                                                                                                                                                              | 132   | 83%     |
| <b>15. Were you tested for competency in comparison as part of your certification process?</b>                                                                                                                                                                                                                                                                                                   |       |         |
| No                                                                                                                                                                                                                                                                                                                                                                                               | 5     | 3%      |
| Not certified                                                                                                                                                                                                                                                                                                                                                                                    | 22    | 14%     |
| Yes                                                                                                                                                                                                                                                                                                                                                                                              | 132   | 83%     |
| <b>16. Have you taken a proficiency test within the past 12 months?</b>                                                                                                                                                                                                                                                                                                                          |       |         |
| No                                                                                                                                                                                                                                                                                                                                                                                               | 24    | 15%     |
| Yes, a test from an outside source                                                                                                                                                                                                                                                                                                                                                               | 84    | 53%     |
| Yes, an internal test                                                                                                                                                                                                                                                                                                                                                                            | 21    | 13%     |
| Yes, both internal and external tests                                                                                                                                                                                                                                                                                                                                                            | 30    | 19%     |

|                                                                                                                                                                                                     | Count | Percent |
|-----------------------------------------------------------------------------------------------------------------------------------------------------------------------------------------------------|-------|---------|
| <b>17. Are you currently or have you previously been employed as a latent fingerprint examiner?</b>                                                                                                 |       |         |
| Currently employed as a latent fingerprint examiner                                                                                                                                                 | 153   | 96%     |
| No                                                                                                                                                                                                  | 4     | 3%      |
| Previously (but not currently) employed as a latent fingerprint examiner                                                                                                                            | 2     | 1%      |
| <b>18. Are you currently conducting latent examinations on a regular basis (at least weekly over an extended period)?</b>                                                                           |       |         |
| No                                                                                                                                                                                                  | 1     | 1%      |
| No, but I have previously conducted latent examinations on a regular basis                                                                                                                          | 20    | 13%     |
| Yes                                                                                                                                                                                                 | 138   | 87%     |
| <b>19. What year did you begin conducting latent casework?</b>                                                                                                                                      |       |         |
| 1960-1969                                                                                                                                                                                           | 3     | 2%      |
| 1970-1979                                                                                                                                                                                           | 14    | 9%      |
| 1980-1989                                                                                                                                                                                           | 25    | 16%     |
| 1990-1999                                                                                                                                                                                           | 27    | 17%     |
| 2000-2009                                                                                                                                                                                           | 84    | 53%     |
| No response                                                                                                                                                                                         | 6     | 4%      |
| <i>Minimum: 1965; Median: 2000; Maximum: 2009; Mean: 1996; St. Dev.: 11.2.</i>                                                                                                                      |       |         |
| <b>20. Have you ever testified in court to a latent fingerprint identification?</b>                                                                                                                 |       |         |
| No                                                                                                                                                                                                  | 18    | 11%     |
| Yes, more than one year ago                                                                                                                                                                         | 46    | 29%     |
| Yes, within past year                                                                                                                                                                               | 95    | 60%     |
| <b>21. Are you a trainee?</b>                                                                                                                                                                       |       |         |
| No                                                                                                                                                                                                  | 152   | 96%     |
| Yes                                                                                                                                                                                                 | 7     | 4%      |
| <i>Three of the 7 "trainees" state they are IAI-Latent certified; two state they have 25 or more years latent experience. None of these seven committed a false positive error.</i>                 |       |         |
| <b>22. What percentage of time have you spent over the last year doing latent comparisons?</b>                                                                                                      |       |         |
| N/A: I am not performing comparisons                                                                                                                                                                | 1     | 1%      |
| Less than 10%                                                                                                                                                                                       | 15    | 9%      |
| 10-25%                                                                                                                                                                                              | 28    | 18%     |
| 25-50%                                                                                                                                                                                              | 28    | 18%     |
| 50-75%                                                                                                                                                                                              | 39    | 25%     |
| 75-100%                                                                                                                                                                                             | 48    | 30%     |
| <b>23. Of the latent-to-exemplar comparisons you have performed over the last year, what proportion do you perform on computer screens, as opposed to looking at physical evidence/paper cards?</b> |       |         |
| N/A: I am not performing comparisons                                                                                                                                                                | 1     | 1%      |
| 0% computer                                                                                                                                                                                         | 18    | 11%     |
| 1-30% computer                                                                                                                                                                                      | 79    | 50%     |
| 30-60% computer                                                                                                                                                                                     | 27    | 17%     |
| 60-99% computer                                                                                                                                                                                     | 25    | 16%     |
| 100% computer                                                                                                                                                                                       | 9     | 6%      |



Count Percent

**Known errors**

|                                                                                                                                             |     |     |
|---------------------------------------------------------------------------------------------------------------------------------------------|-----|-----|
| <b>24. Are you aware of ever having made an erroneous individualization (after training)? (Check all that apply - may add to over 100%)</b> |     |     |
| No response                                                                                                                                 | 3   | 2%  |
| No                                                                                                                                          | 150 | 94% |
| Yes, on casework; detected after it was reported to contributor                                                                             | 1   | 1%  |
| Yes, on a proficiency test only                                                                                                             | 1   | 1%  |
| Yes, on casework; detected during verification                                                                                              | 4   | 3%  |

*On question 24, there was no overlap among the three categories of "Yes" answers.*

|                                                                                                                                     |     |     |
|-------------------------------------------------------------------------------------------------------------------------------------|-----|-----|
| <b>25. Are you aware of ever having made an erroneous exclusion (after training)? (Check all that apply - may add to over 100%)</b> |     |     |
| No response                                                                                                                         | 2   | 1%  |
| No                                                                                                                                  | 103 | 65% |
| Yes, on casework; detected after it was reported to contributor                                                                     | 10  | 6%  |
| Yes, on a proficiency test only                                                                                                     | 4   | 3%  |
| Yes, on casework; detected during verification                                                                                      | 43  | 27% |

*On question 25, one examiner indicated "Yes" both on a proficiency test and on casework detected during verification. Two examiners indicated "Yes" both on casework detected after reporting and on casework detected during verification.*

**Standard operating procedures**

|                                                                                                                                                                                                                                                             |     |     |
|-------------------------------------------------------------------------------------------------------------------------------------------------------------------------------------------------------------------------------------------------------------|-----|-----|
| <b>26. If you have determined that a latent is of value and have started to conduct comparisons, are you permitted to change your mind and relabel the latent as no value? (Given the standard operating procedures that you/your agency currently use)</b> |     |     |
| No                                                                                                                                                                                                                                                          | 13  | 8%  |
| Yes                                                                                                                                                                                                                                                         | 146 | 92% |

|                                                                                                                                                                                                                                                             |     |     |
|-------------------------------------------------------------------------------------------------------------------------------------------------------------------------------------------------------------------------------------------------------------|-----|-----|
| <b>27. Does your organization permit an official conclusion of less than individualization, more than inconclusive, such as "limited match" or "qualified identification"? (Given the standard operating procedures that you/your agency currently use)</b> |     |     |
| No                                                                                                                                                                                                                                                          | 152 | 96% |
| Yes                                                                                                                                                                                                                                                         | 7   | 4%  |

|                                                                                                                                                                                                                                                                                                                                                                          |    |     |
|--------------------------------------------------------------------------------------------------------------------------------------------------------------------------------------------------------------------------------------------------------------------------------------------------------------------------------------------------------------------------|----|-----|
| <b>28. If the latent and exemplar are both of value, include a large potentially corresponding area, no other latent or exemplars images are available, and you already have all processing information related to the latent, are you permitted to make an inconclusive determination? (Given the standard operating procedures that you/your agency currently use)</b> |    |     |
| Inconclusive determinations are discouraged but possible in this case                                                                                                                                                                                                                                                                                                    | 31 | 19% |
| Inconclusive determinations are freely accepted in this case                                                                                                                                                                                                                                                                                                             | 77 | 48% |
| Inconclusive determinations are not permitted in this case                                                                                                                                                                                                                                                                                                               | 51 | 32% |

|                                                                                                                                                                                                                                                                              |    |     |
|------------------------------------------------------------------------------------------------------------------------------------------------------------------------------------------------------------------------------------------------------------------------------|----|-----|
| <b>29. In determining the value/sufficiency of a latent impression, how do you define an impression that is not suitable for individualization but could potentially be used for exclusion? (Given the standard operating procedures that you/your agency currently use)</b> |    |     |
| It has its own category used in standard practice, such as "Of value for exclusion only" or "Limited value"                                                                                                                                                                  | 27 | 17% |
| It has its own category, such as "Of value for exclusion only" or "Limited value" – but only used upon request                                                                                                                                                               | 21 | 13% |
| No value                                                                                                                                                                                                                                                                     | 88 | 55% |
| Of value                                                                                                                                                                                                                                                                     | 23 | 14% |

|                                                                                                                                                                                                                                 | <i>Count</i> | <i>Percent</i> |
|---------------------------------------------------------------------------------------------------------------------------------------------------------------------------------------------------------------------------------|--------------|----------------|
| <b>30. How often in casework do you make a conclusion that a latent and the exemplars provided definitively did not come from the same source? (Given the standard operating procedures that you/your agency currently use)</b> |              |                |
| Never                                                                                                                                                                                                                           | 5            | 3%             |
| Used only on request                                                                                                                                                                                                            | 4            | 3%             |
| Rarely                                                                                                                                                                                                                          | 16           | 10%            |
| Often                                                                                                                                                                                                                           | 134          | 84%            |
| <b>31. How do you use the term "exclusion" as a conclusion? (Given the standard operating procedures that you/your agency currently use)</b>                                                                                    |              |                |
| Any comparison that is not an individualization is an exclusion                                                                                                                                                                 | 7            | 4%             |
| Exclusion means that the latent did not come from any finger for that subject, but could have come from other friction ridge skin (e.g., palm) from that subject                                                                | 16           | 10%            |
| Exclusion means that the latent did not come from any friction ridge skin for that subject                                                                                                                                      | 81           | 51%            |
| Exclusion means that the latent did not come from the source of the exemplar (e.g., a specific finger), but could have come from another finger from that subject                                                               | 18           | 11%            |
| Not used                                                                                                                                                                                                                        | 37           | 23%            |

### 1.5 Instructions to participants

The following are from the instructions given to the participants. The wording of the determinations is identical to the wording in the software.

#### Summary of Test Procedure

In the Black Box Study, you will be asked to perform a series of 100 comparisons. For each comparison, you will go through these steps:

- You will be presented a latent image for analysis, and asked to make a determination whether the latent is of value for individualization and/or exclusion. (See the Analysis and Comparison Determinations section for detail)
- If you determine that the latent is of value, you will be presented with a single exemplar image for comparison, and asked to make a comparison determination. (See the Analysis and Comparison Determinations section for detail)
- You may optionally make image enhancements, zoom in or out, or mark features in the latent or exemplar images. These are for your benefit, and may be used or ignored at your discretion. (See the General Guidance section for detail)
- At the end of each comparison, you have a chance to review the determinations you made for that comparison before you save your results for that comparison.

#### Analysis and Comparison Determinations

It is imperative that you conduct your analyses and comparisons in this study with the same diligence that you use in performing casework.

This section explains the determinations you will be asked to make, with explanations of the options. Note that which determinations you are asked to make depends on your previous answers for that comparison.

- #1 — Value for individualization
- #2 — Value for exclusion (only if #1 is “No Value”)
- #3 — Comparison determination (only if #1 or #2 is “Of Value...”)
- #4 — Reason for inconclusive (only if #3 is “Inconclusive”)
- #5 — Reason for exclusion (only if #3 is “Exclusion”)
- #6 — Difficulty (only if #1 or #2 is “Of Value...”)

The determinations as defined here may not correspond precisely to you/your organization’s current procedures. Please try to follow the guidance in this section as closely as possible so that responses from different people/organizations are comparable.

**#1 — Value for individualization**

Assess the value of the latent image for individualization. You may (optionally) mark points in the latent image; these points are solely for your reference.

|    |                                    |                                                                                                                        |
|----|------------------------------------|------------------------------------------------------------------------------------------------------------------------|
| 1a | Of value for individualization     | The impression is of value and is appropriate for potential individualization if an appropriate exemplar is available. |
| 1b | Not of value for individualization | The impression is not of value for individualization.                                                                  |

**#2 — Value for exclusion**

Note: only applies if “Not of value for individualization” (1b)

Given that the latent image is NOT of value for individualization, assess the value of the latent image for exclusion.

|    |                               |                                                                                                                                                                 |
|----|-------------------------------|-----------------------------------------------------------------------------------------------------------------------------------------------------------------|
| 2a | May be of value for exclusion | The impression contains some friction ridge information (level 1 and/or level 2) that may be appropriate for exclusion if an appropriate exemplar is available. |
| 2b | Not of value for exclusion    | The impression contains no usable friction ridge information.                                                                                                   |

**#3 — Comparison determination**

Note: only applies if “Of value for individualization or exclusion” (1a or 2a)

Compare the latent and exemplar images. You may (optionally) mark points in the latent and/or exemplar images; these points are solely for your reference.

|    |                     |                                                         |
|----|---------------------|---------------------------------------------------------|
| 3a | Individualization   | The two fingerprints originated from the same finger.   |
| 3b | Inconclusive        | Neither individualization nor exclusion is possible.    |
| 3c | Exclusion of finger | The two fingerprints did not come from the same finger. |

**#4 — Reason for inconclusive**

Note: only applies if “Inconclusive” (3b)

Explain the reason for the inconclusive determination.

|    |                                                     |                                                                                                                                                                                                                                                                                                                      |
|----|-----------------------------------------------------|----------------------------------------------------------------------------------------------------------------------------------------------------------------------------------------------------------------------------------------------------------------------------------------------------------------------|
| 4a | Inconclusive due to no overlapping area             | Corresponding areas (or potentially corresponding areas) of friction ridge detail are absent.                                                                                                                                                                                                                        |
| 4b | Inconclusive due to insufficient information        | Potentially corresponding areas are present, but they contain insufficient corresponding or contradictory data. This option should be selected if the exemplar is not of value.                                                                                                                                      |
| 4c | Inconclusive, but with corresponding features noted | No conclusive determination can be made. Corresponding features are present, and no substantive contradictory features are present. The correspondence of features is supportive of the conclusion that the two impressions originated from the same source, but not to the extent sufficient for individualization. |

**#5 — Reason for exclusion**

Note: only applies if “Exclusion” (3c)

Explain the reason for the exclusion.

|    |                                |                                                                                                                                                                       |
|----|--------------------------------|-----------------------------------------------------------------------------------------------------------------------------------------------------------------------|
| 5a | Pattern class/ridge flow alone | The exclusion could be made based on pattern class/ridge flow/level-1 information alone. The exclusion did not require review of minutiae and/or Level-3 information. |
| 5b | Minutiae and/or level 3        | The exclusion determination required comparison of Level-2 and/or Level-3 information.                                                                                |

## #6 — Difficulty

Note: only applies if “Of value for individualization” or “Of value for exclusion” (1a or 2a)

How easy or difficult was it to make the comparison determination?

|    |                   |                                                                                           |
|----|-------------------|-------------------------------------------------------------------------------------------|
| 6a | Very Easy/Obvious | The comparison determination was obvious.                                                 |
| 6b | Easy              | The comparison was easier than most latent comparisons.                                   |
| 6c | Moderate          | The comparison was a typical latent comparison.                                           |
| 6d | Difficult         | The comparison was more difficult than most latent comparisons.                           |
| 6e | Very Difficult    | The comparison was unusually difficult, involving high distortion and/or other red flags. |

## Comments

For each question, a comment box is available; this is intended to allow examiners to provide comments on the test process to the test administrators. Examples include software issues, data entry errors, an exceptional image whose inclusion in the test might be inadvertent, any problems taking the test. The comment box is *not* intended to routinely capture your thought process in reaching conclusions: comments should be reserved for exceptional circumstances.

## General Guidance

When conducting analyses and comparisons, please note:

- You may assume that the images provided are the only images available, and that physical evidence, lift cards, fingerprint cards, and additional exemplars are not available.
- You may assume that every impression is a fingerprint, not a palmprint or lower joint.
- For an inconclusive determination, it is assumed that additional exemplars would have been requested; it is not necessary to state this in a comment.
- For the “Of value...” determinations, make the determination for the latent with the assumption that a good-quality exemplar with a large corresponding area may be available. The specific exemplar shown for comparison may or may not meet these criteria, but that should have no bearing on the “Of value...” determinations for the latent.
- No images have already been claimed “Of value.” In a few images, impressions were marked to indicate which impressions were to be scanned; such marks do not indicate that another examiner necessarily determined that the print is of value.
- If you believe that the exemplar is not of value, the comparison should be noted as “Inconclusive due to insufficient information” (#3b & #4b).

## 2 Decision rates

| Comparison Decision | Latent Value   | Total  | Mates  | Non-mates | % of mated pairs |        |        | % of non-mated pairs |        |        |
|---------------------|----------------|--------|--------|-----------|------------------|--------|--------|----------------------|--------|--------|
|                     |                |        |        |           | PRES             | CMP    | VID    | PRES                 | CMP    | VID    |
| (not compared)      | NV             | 3,947  | 3,389  | 558       | 29.3%            |        |        | 10.1%                |        |        |
| Exclusion           | VEO            | 486    | 161    | 325       | 1.4%             | 2.0%   |        | 5.9%                 | 6.5%   |        |
| Exclusion           | VID            | 4,072  | 450    | 3,622     | 3.9%             | 5.5%   | 7.5%   | 65.3%                | 72.7%  | 88.7%  |
| Inconclusive        | VEO            | 2,596  | 2,019  | 577       | 17.4%            | 24.7%  |        | 10.4%                | 11.6%  |        |
| Inconclusive        | VID            | 2,311  | 1,856  | 455       | 16.0%            | 22.7%  | 31.1%  | 8.2%                 | 9.1%   | 11.1%  |
| Individualization   | VEO            | 40     | 40     | 0         | 0.3%             | 0.5%   |        | 0.0%                 | 0.0%   |        |
| Individualization   | VID            | 3,669  | 3,663  | 6         | 31.6%            | 44.7%  | 61.4%  | 0.1%                 | 0.1%   | 0.1%   |
| Totals              |                | 17,121 | 11,578 | 5,543     | 100.0%           | 100.0% | 100.0% | 100.0%               | 100.0% | 100.0% |
| Total comparisons   | Value (either) | 13,174 | 8,189  | 4,985     |                  |        |        |                      |        |        |
| Total comparisons   | VID            | 10,052 | 5,969  | 4,083     |                  |        |        |                      |        |        |

Table S5: Decisions by 169 examiners on 17,121 presentations of 744 image pairs. False positive and false negative counts and rates are highlighted in yellow. Rates of comparison decisions are calculated as a percentage of all presentations, including latents of no value (PRES), including latents of no value (NV); of comparisons where the latent was of value for individualization (VID); or of all comparisons (CMP), including comparisons where the latent was of value for exclusion only (VEO) as well as VID. Figure 2 in the main report depicts the six rightmost columns.

| Comparison Decision                     | VEO   |       |           | VID   |       |           |
|-----------------------------------------|-------|-------|-----------|-------|-------|-----------|
|                                         | Total | Mates | Non-mates | Total | Mates | Non-mates |
| Exclusion                               | 486   | 161   | 325       | 4,072 | 450   | 3,622     |
| - <i>Minutiae and/or level 3</i>        | 231   | 53    | 178       | 3,529 | 384   | 3,145     |
| - <i>Pattern class/ridge flow alone</i> | 255   | 108   | 147       | 543   | 66    | 477       |
| Inconclusive                            | 2,596 | 2,019 | 577       | 2,311 | 1,856 | 455       |
| - <i>Corresponding features noted</i>   | 396   | 304   | 92        | 620   | 500   | 120       |
| - <i>Insufficient information</i>       | 489   | 440   | 49        | 499   | 454   | 45        |
| - <i>No overlapping area</i>            | 1,711 | 1,275 | 436       | 1,192 | 902   | 290       |

Table S6: Reasons given for exclusion and inconclusive decisions. For specific wording, see SI-1.5, questions #4 and #5. Posterior probabilities for exclusion decisions depending on exclusion reason are shown in Fig. S8. The mated pairs included a greater proportion of poor quality prints than the non-mated pairs. Whereas poor-quality latents result in NV decisions (Table S5), the poor-quality exemplars contribute to an increase in the proportion of inconclusive decisions.

### 2.1 Confidence intervals

We report confidence intervals for two of our rate estimates in order to provide an indication of the reliability of these estimates. These intervals should be interpreted under the assumption that the sample data are representative of decisions by a similar group of examiners performed on similar images – not the universal population of examiners and images. Additionally, the estimate we use, the Agresti-Coull, like most other confidence interval methods, assumes independence among the decisions. Because our data include many commonalities of examiners and image pairs, we expect the confidence intervals presented here to be somewhat narrower than appropriate for the data.

Six false positives occurred among 4,083 non-mated comparisons where the latent was VID, for a false positive rate  $FPR_{VID} = 0.15\%$ , with a 95% confidence interval of 0.06% to 0.3%. Similarly, 450 false negatives occurred among 5,969 mated VID comparisons, for a false negative rate  $FNR_{VID} = 7.5\%$ , with 95% confidence interval of 6.9% to 8.2%.

### 2.2 Distributions

Image pairs were randomly assigned to examiners (through random resampling of the pool of available image pairs). This method resulted in a large variance in the number of times each pair was presented.

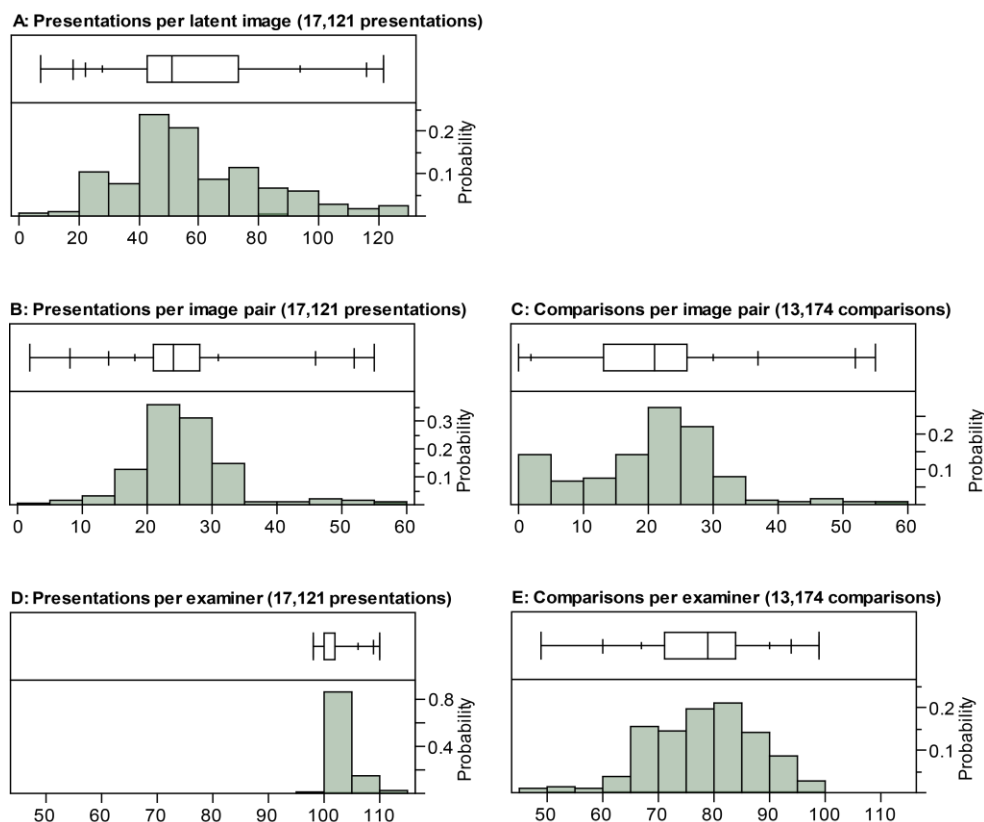

Fig. S1: A: Number of presentations of each latent image (17,121 presentations of 356 latent images). B/C: Number of presentations and comparisons (both VID and VEO) varied substantially by image pair (n=744 image pairs). D/E: Number of presentations and comparisons (both VID and VEO) of image pairs by examiner (n= 169 examiners).

### 3 Individual examiner error and success rates

|        | CR   |     |      | TPR  |     |     | TNR  |      |      | FNR  |     |     |
|--------|------|-----|------|------|-----|-----|------|------|------|------|-----|-----|
|        | PRES | CMP | VID  | PRES | CMP | VID | PRES | CMP  | VID  | PRES | CMP | VID |
| Min    | 13%  | 19% | 22%  | 11%  | 18% | 29% | 7%   | 8%   | 5%   | 0%   | 0%  | 0%  |
| Median | 49%  | 63% | 79%  | 31%  | 44% | 62% | 74%  | 82%  | 92%  | 4%   | 6%  | 6%  |
| Max    | 73%  | 94% | 100% | 57%  | 91% | 94% | 96%  | 100% | 100% | 24%  | 32% | 34% |
| Mean   | 48%  | 63% | 77%  | 32%  | 46% | 61% | 71%  | 79%  | 88%  | 5%   | 7%  | 7%  |
| s.d.   | 11%  | 12% | 11%  | 9%   | 12% | 12% | 14%  | 15%  | 14%  | 5%   | 7%  | 7%  |

Table S7: Summary statistics for individual examiner success and error rates.

Because false positive errors occurred infrequently (0.1% overall), and due to the limited number of non-mated pairs assigned to each examiner (26 to 53 non-mated image pairs per examiner, mean 33, s.d. 7), it would not be realistic to conclude that the actual FPR of an examiner who committed one or two false positive errors can be distinguished from the actual FPR of an examiner who committed no false positive errors. The difficulty of comparing FPRs of individual examiners is compounded by the fact the each examiner saw a different set of images.

### 4 False positives

Table S8 shows details for the six false positive errors (erroneous individualizations) encountered in this study, labeled A-F. The images for pairs B & C are shown in Figure 3. Pairs C & D both resulted in false positives by the same examiner; D & F involved the same latent, but the exemplars were from different subjects. The method of selection of exemplar included the rank 1 candidate from IAFIS search; examiner-selected most difficult comparison from top 20 candidates from IAFIS search;

neighboring finger from the actual subject. Latent B was processed with black powder (BP); the others were processed with cyanoacrylate and light gray powder (CA+GP) and were partially or fully tonally reversed. The highlighted table cells correspond to the responses of the examiner who committed each error. The examiner who made two false positive errors made them on consecutive comparisons.

| Image pair label                  | A        | B        | C        | D      | E        | F        |
|-----------------------------------|----------|----------|----------|--------|----------|----------|
| Examiner certifications           | Other    | IAI      | IAI      | IAI    | NA       | None     |
| Method of selection of exemplar   | Selected | Neighbor | Neighbor | Rank 1 | Selected | Selected |
| Latent processing                 | CA+GP    | BP       | CA+GP    | CA+GP  | CA+GP    | CA+GP    |
| Tonal reversal                    | Partial  | None     | Partial  | Full   | Full     | Full     |
| <b>Latent value</b>               |          |          |          |        |          |          |
| No Value (NV)                     |          |          |          |        |          |          |
| Exclusion only (VEO)              | 13       |          |          | 1      |          | 1        |
| Value for Individualization (VID) | 13       | 30       | 26       | 97     | 22       | 97       |
| <b>Comparison decision</b>        |          |          |          |        |          |          |
| Exclusion                         | 8        | 24       | 22       | 21     | 20       | 21       |
| Inconclusive (no overlap)         | 14       | 2        | 2        |        |          | 1        |
| Inconclusive (insufficient)       | 2        | 2        |          |        |          |          |
| Inconclusive (corresponding)      | 1        | 1        | 1        |        | 1        |          |
| Individualization                 | 1        | 1        | 1        | 1      | 1        | 1        |
| <b>Comparison difficulty</b>      |          |          |          |        |          |          |
| Obvious                           |          |          | 1        | 6      | 2        |          |
| Easy                              | 1        | 3        |          | 9      | 10       | 8        |
| Medium                            | 14       | 19       | 14       | 7      | 9        | 11       |
| Difficult                         | 9        | 7        | 10       |        | 1        | 4        |
| Very Difficult                    | 2        | 1        | 1        |        |          |          |

Table S8: Summary description of the 6 false positive errors. Each column describes one of the six image pairs on which a false positive error occurred. The counts indicate for each image pair the distribution of all examiners responses. The counts for latent value include all presentations of this latent image, some of which occurred in pairings with a different exemplar image. The response of the specific examiner who committed the error is indicated by highlighting the cell for that response.

## 5 Correlations between experience and examiner performance

Length of experience as a latent print examiner did not show a significant correlation with any of the following performance indicators:  $TPR_{VID}$ ,  $TNR_{VID}$ , and  $FNR_{VID}$ .

Examiners with lower  $TPR_{VID}$  tended also to have lower  $TNR_{VID}$ . Examiners with higher  $FNR_{VID}$  tended to have lower  $TPR_{VID}$ . Examiners with higher  $TNR_{VID}$  tended also to have higher  $FNR_{VID}$ .

|             | Years of Latent Experience                                                              | $TNR_{VID}$                                                                             | $FNR_{VID}$                                                                               |
|-------------|-----------------------------------------------------------------------------------------|-----------------------------------------------------------------------------------------|-------------------------------------------------------------------------------------------|
| $TPR_{VID}$ | $\rho: 0.017$ (p-value = 0.835)<br>$R_{x,y}: 0.131$ (p-value = 0.103)<br>$R^2: 0.00028$ | $\rho: 0.333$ (p-value < 0.0001)<br>$R_{x,y}: 0.286$ (p-value = 0.0003)<br>$R^2: 0.111$ | $\rho: -0.346$ (p-value < 0.0001)<br>$R_{x,y}: -0.279$ (p-value = 0.0004)<br>$R^2: 0.120$ |
| $FNR_{VID}$ | $\rho: 0.149$ (p-value = 0.063)<br>$R_{x,y}: 0.143$ (p-value = 0.075)<br>$R^2: 0.022$   | $\rho: 0.310$ (p-value < 0.0001)<br>$R_{x,y}: 0.374$ (p-value < 0.0001)<br>$R^2: 0.140$ |                                                                                           |
| $TNR_{VID}$ | $\rho: 0.169$ (p-value = 0.035)<br>$R_{x,y}: 0.165$ (p-value = 0.039)<br>$R^2: 0.028$   |                                                                                         |                                                                                           |

Table S9: Correlations among examiner performance measures and years of latent experience. Three measures of association were analyzed:  $\rho$ , Pearson correlation coefficient;  $R_{x,y}$ , Spearman rank correlation coefficient;  $R^2$ , Coefficient of determination.

One examiner was excluded from this correlation analysis as an outlier due to the extremely low true negative rate (5.3%) and low true positive rate (31.4%).

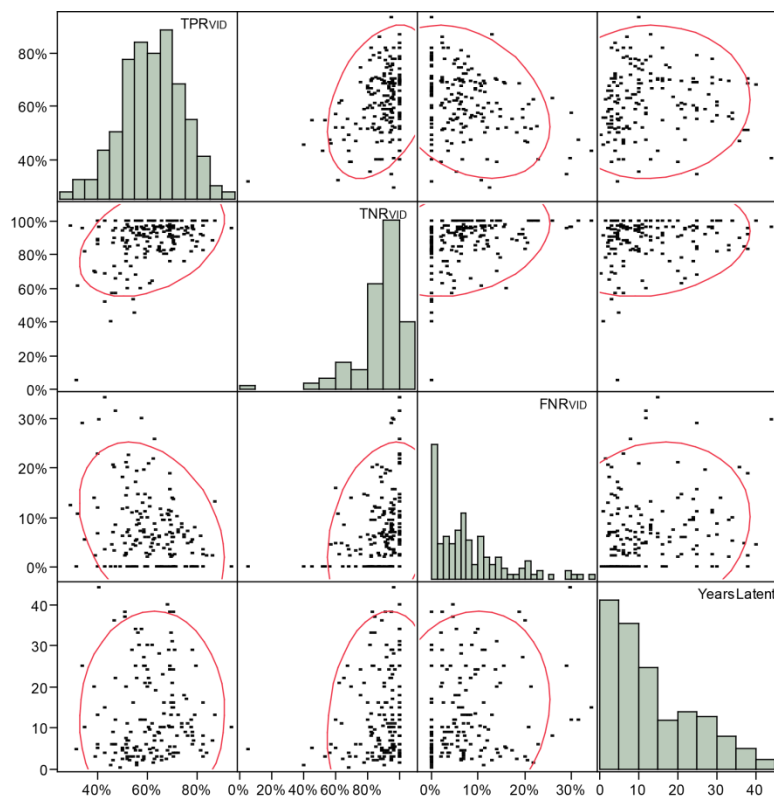

Fig. S2: Scatterplot of examiner performance measures and years of latent experience

## 6 Correlations between certification and examiner performance

Certified examiners had significantly higher  $TPR_{VID}$  and higher  $TNR_{VID}$  than non-certified examiners;  $FNR_{VID}$  did not vary significantly with certification.

In many cases, the distributions were skewed and assumptions of homogeneous variances, equal sample size, and normally distributed errors were not met. Several nonparametric tests of location were used to test whether performance of the groups differed. Results of the Welch ANOVA test are reported below.

|                 | $FNR_{VID}$   |                      | $TNR_{VID}$   |                      | $TPR_{VID}$   |                      |
|-----------------|---------------|----------------------|---------------|----------------------|---------------|----------------------|
|                 | Not certified | Certified (any type) | Not certified | Certified (any type) | Not certified | Certified (any type) |
| Maximum         | 0.343         | 0.316                | 1.000         | 1.000                | 0.793         | 0.935                |
| Decile (90%)    | 0.210         | 0.179                | 1.000         | 1.000                | 0.667         | 0.780                |
| Quartile (75%)  | 0.129         | 0.105                | 0.952         | 0.965                | 0.610         | 0.703                |
| Median          | 0.056         | 0.062                | 0.842         | 0.929                | 0.548         | 0.645                |
| Quartile (25%)  | 0.000         | 0.024                | 0.684         | 0.860                | 0.457         | 0.553                |
| Decile (10%)    | 0.000         | 0.000                | 0.444         | 0.765                | 0.398         | 0.482                |
| Minimum         | 0.000         | 0.000                | 0.053         | 0.533                | 0.314         | 0.342                |
| Mean            | 0.077         | 0.074                | 0.786         | 0.901                | 0.537         | 0.635                |
| Std Dev         | 0.086         | 0.070                | 0.221         | 0.099                | 0.104         | 0.114                |
| p-value (Welch) | 0.871         |                      | 0.013         |                      | < 0.0001      |                      |

Table S10: Correlations between certification and examiner performance. Of the participants; 27 were not certified, and 132 were certified (including all types of certification); 10 participants who did not respond to the background survey were excluded from this analysis.



## 7 Variability in test results

It is important to understand both the magnitude and source of variability in the test results. A wide variability in examiner skill might motivate increased training and certification. A wide variability in latent value decisions might motivate standardization of terminology or procedures. Variability in performance on image pairs might reveal the extent to which errors are tied to image attributes vs. careless mistakes or training issues.

Even if every examiner were equally skillful, we would expect some variability in the measured examiner rates due to the random image assignments and other random factors (such as interruptions during the test). A reasonable null hypothesis for the rate distributions might be a binomial distribution. Due to the complicated test structure, a binomial distribution is not quite the right basis for this comparison: examiners were not all presented mated and non-mated image pairs in exactly the same proportion; based on latent value decisions, examiners performed a different number of comparisons; and the number of examiners to which each image pair was presented varied substantially (SI-2.2).

In order to understand how the rate distributions (by examiner and by image pair) differed from a simple binomial expectation (null hypothesis), we produced probability-probability plots of observed distributions vs. simulated results (Fig. S3). The simulations retained the exact test structure, in particular the assignment of image pairs to examiners and the latent value decisions, but replaced the actual examiner comparison decisions by a uniform random variable parameterized to the rate measured across the entire test.

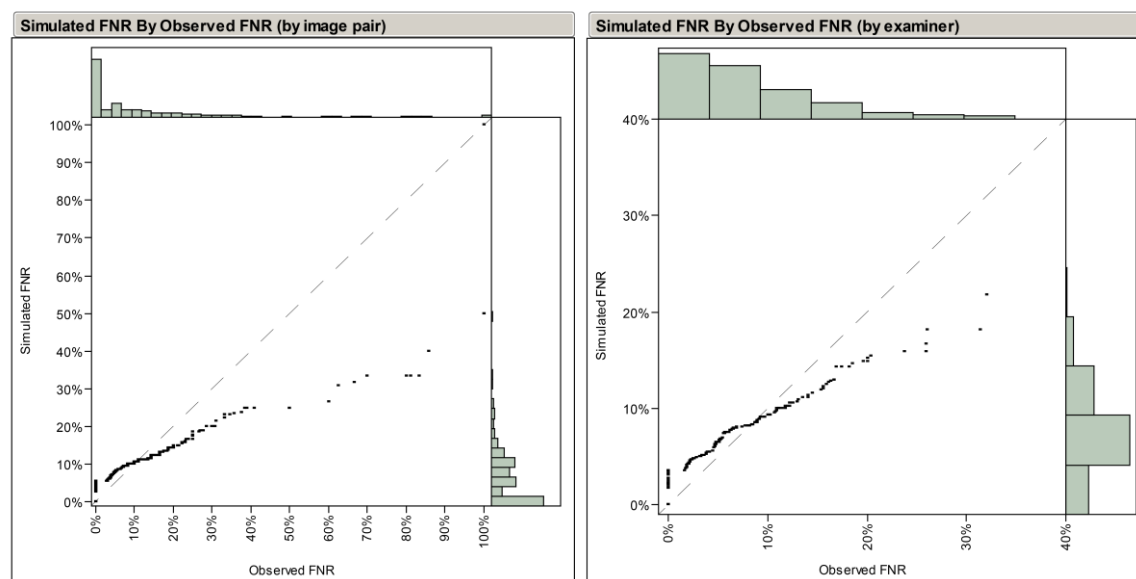

Fig. S3: Probability-Probability plots comparing the observed  $FNR_{CMP}$  to simulated  $FNR_{CMP}$ : (A) by image pair; (B) by examiner. Data is based on 17,121 presentations of 469 image pairs to 169 examiners. The simulation preserved the exact test structure (assignments of image pairs to examiners) and the actual latent value decisions, but replaced examiner comparison responses by random values with  $P(\text{exclusion}) = 7.5\%$ , i.e., a simple weighted coin toss. In (A), the point at the origin represents 34% of data; another 14% lies directly above that point. In (B), the point at the origin represents 2% of the data; another 12% lies directly above that point.

The observed false negative rates have a heavier tail than the simulated rates, meaning that some image pairs (and some examiners) have a significantly higher than average rate. The observed rates have a greater concentration at zero, meaning that some image pairs (and some examiners) have a significantly lower than average rate. The model explains much of the observed variability, meaning that the true extent of variability by image pair (and by examiner) is much less than it first appears.

A similar analysis of latent value decisions (Fig. S4) reveals that many individual examiners have strong tendencies toward NV or VID decisions. Note that this analysis focuses on latent images on which value decisions were not unanimous.

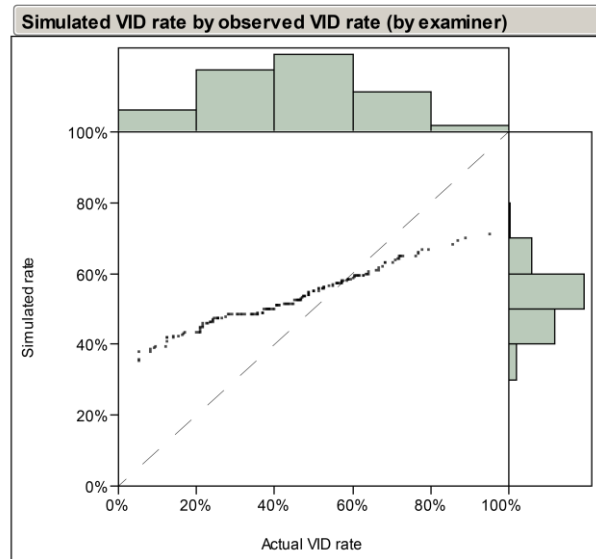

Fig. S4: Probability-Probability plot comparing the observed VID rate (proportion of latent images decided to be VID) to a simulated VID rate. The simulation preserved the exact test structure of assignments of latent images to examiners, but replaced actual VID decisions by random values with  $P(\text{VID}) = 53\%$ , i.e., a simple weighted coin toss. Actual value decisions show strong individual examiner tendencies toward either NV or VID. Chart shows VID decision rates for 169 examiners based on 6,684 latent value decisions on 169 latent images on which value decisions were not unanimous.

Confidence intervals are provided in Fig. S5 as an indicator of measurement precision or reproducibility. For confidence intervals by examiner, we assumed that future measurements would involve the same examiners with similar sets of images. For FNR confidence intervals by mated image pair, we assumed that future measurements would involve the same mated pairs with similar groups of examiners.

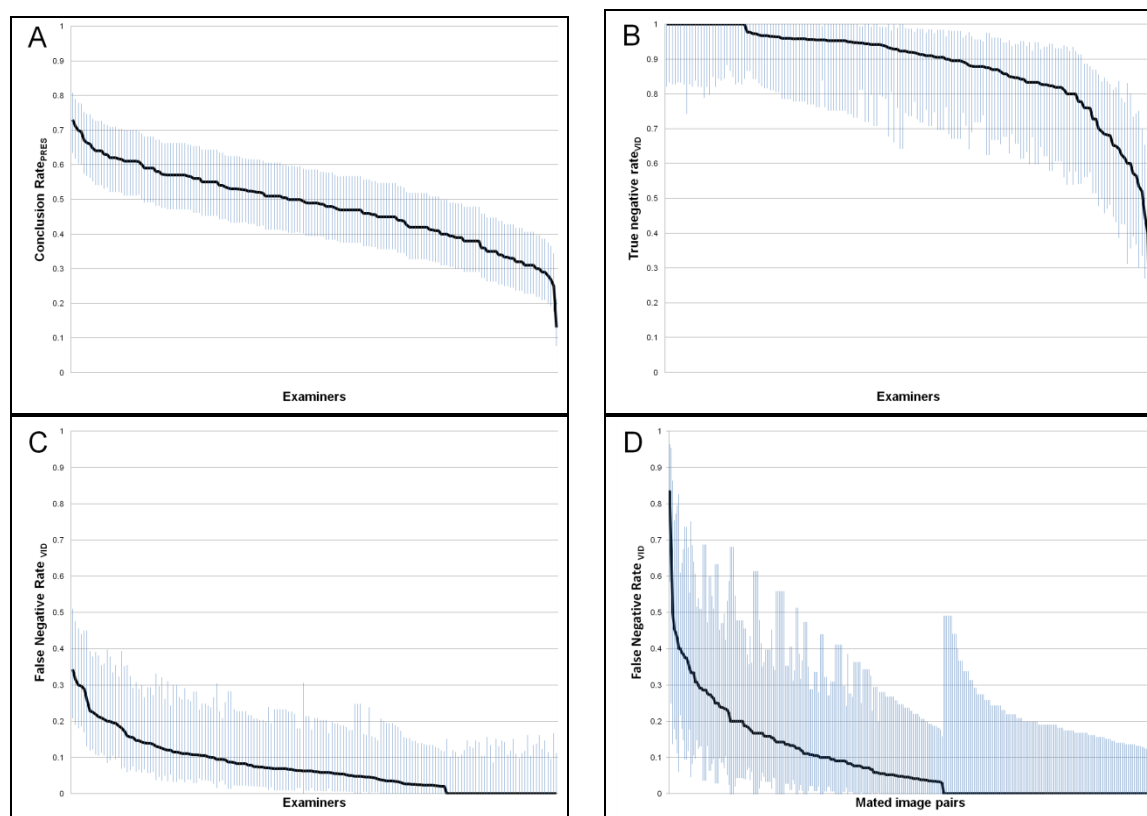

Fig. S5: (A) Conclusion rates ( $CR_{PRES}$ ; 17,121 presentations of 744 image pairs to 169 examiners), (B) true negative rates ( $TNR_{VID}$ ; 4,083 VID comparisons of 224 non-mated pairs by 169 examiners), and (C) false negative rates ( $FNR_{VID}$ ; 5,969 VID comparisons of 520 mated pairs to 169 examiners) and their 95% Agresti-Coull confidence intervals by examiner. (D) False negative rates ( $FNR_{VID}$ ; 5,969 VID comparisons of 446 mated pairs) and their 95% Wilson Score confidence intervals by mated image pair.<sup>†</sup> The Wilson Score interval was used due to the small sample sizes for many image pairs. 74 image pairs with 4 or fewer comparisons were excluded from this figure (D).

When asked whether latent images were VID, examiners agreed unanimously on 151/356 images. Each examiner was presented from 48 to 74 latent images on which the VID decisions were not unanimous (mean 60.6; sd 4.1).

One minor factor contributing to the lack of consensus is intra-examiner inconsistency. Within the tests, the same latent image was sometimes presented to one examiner on two different occasions (i.e., within a period of hours or days), but paired with different exemplar images. Through random assignments, 147 latent images were presented twice to the same examiner for a total of 900 observations. Examiners changed their VID decisions at a rate of 8%. Most of these were borderline cases: when the latent was not considered VID, it was considered VEO. In 10 cases (1%), a complete reversal was observed, between VID and NV. Additional data on intra-examiner variability in comparisons is being collected in a separate repeatability study (manuscript in preparation).

<sup>†</sup> Image pairs in chart D are sorted first by FNR, then secondarily by confidence interval. The apparent discontinuity is an artifact of the sort order.

## 8 Examiner consensus

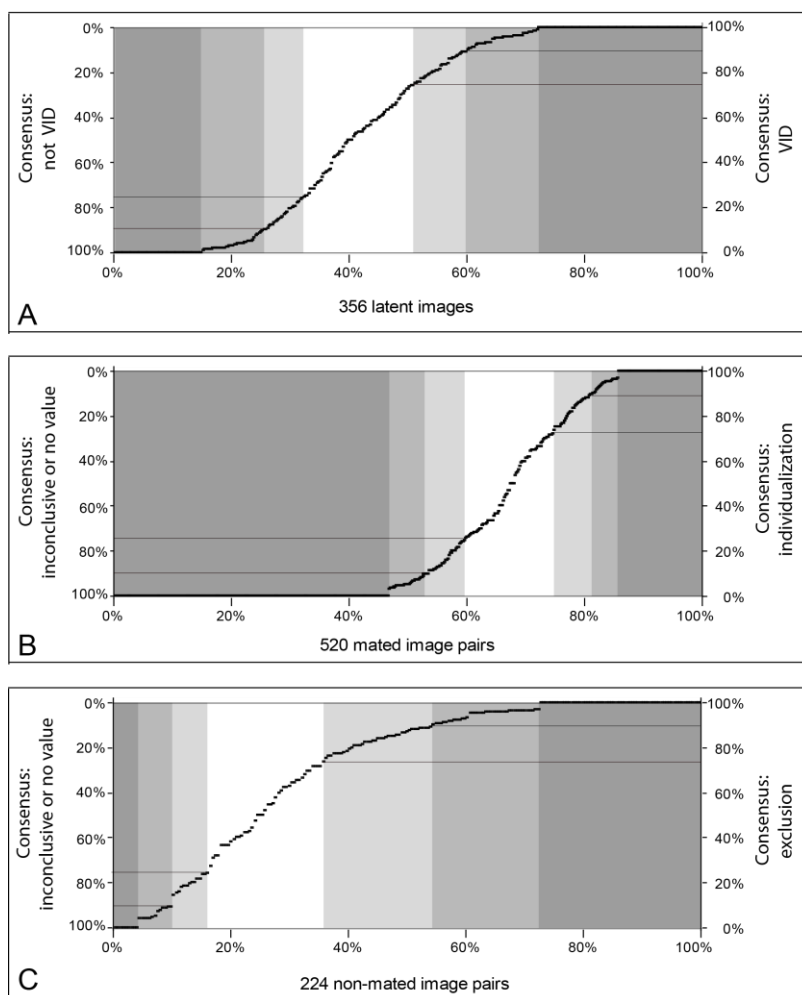

Fig. S6: Examiner consensus on decisions: (A) VID, (B) individualization of mated pairs (excluding false negatives), (C) exclusion of non-mated pairs (excluding false positives). Charts show the percentage of examiners reaching consensus (y-axis) on each image/image pair (x-axis). Areas of unanimous (100%), decile (10%,90%), and quartile (25%,75%) consensus are marked. For example, in (A), at a 90% level of consensus (y-axis), examiners agreed that 40% of the latents were VID (interval from 60% to 100% indicated by a horizontal line in upper right) (Table S11). Such measures of consensus may be useful in developing quantity and quality metrics. These distributions reflect the data selection and may be used to guide the design of future tests. Chart A is identical to Figure 6.

|                                               | Level of consensus               |                  |                  |
|-----------------------------------------------|----------------------------------|------------------|------------------|
|                                               | Unanimous<br>(100% of examiners) | 90% of examiners | 75% of examiners |
| (A) VID (356 latents)                         | 43%                              | 66%              | 81%              |
| (B) Individualization (520 mated image pairs) | 61%                              | 73%              | 85%              |
| (C) Exclusion (224 non-mated image pairs)     | 32%                              | 56%              | 80%              |

Table S11: Supporting data for Figure 6 and Fig. S6. Examiner consensus on decisions: (A) value for individualization (VID), (B) individualization of mated pairs (excluding false negatives), (C) exclusion of non-mated pairs (excluding false positives). Agreement includes both extremes, e.g., in (A), 100% of examiners agreed on the VID decision for 43% of latents (including both VID and not VID decisions). Data values indicate the percentage of images on which this level of agreement was reached. The extent of consensus reflects the selection of data in the study: e.g., a greater proportion of pristine prints would have increased the proportion of prints that examiners found to be of value.

## 9 Positive and negative predictive values

Positive and negative predictive values are functions of the prior prevalence of mated pairs among the examinations performed. These functions permit the estimation of the predictive values for other test mixes. We estimate Positive Predictive Value (PPV) as the observed rate True Positives/(True Positives + False Positives). We adjust this rate based on a prior prevalence of mated image pair comparisons performed using the following formula:

$$PPV_{\text{MatePrevalence}} = \frac{\text{MatePrevalence} * TPR}{(\text{MatePrevalence} * TPR) + (\text{NonmatePrevalence} * FPR)}$$

where

- MatePrevalence is the percentage of all comparisons that were performed on mated pairs,
- MatePrevalence + NonmatePrevalence = 100%, and
- TPR = Count of True Positives / Count of mate comparisons.

Similarly, we estimate Negative Predictive Value (NPV) as the observed rate True Negatives/(True Negatives + False Negatives). We adjust this rate based on a prior prevalence of mated image pair comparisons performed using the following formula:

$$NPV_{\text{MatePrevalence}} = \frac{\text{NonmatePrevalence} * TNR}{(\text{NonmatePrevalence} * TNR) + (\text{MatePrevalence} * FNR)}$$

where

- TNR = Count of True Negatives / Count of non-mate comparisons.

If comparisons are performed in a context where mated pairs are common, false negatives will be relatively more common: PPV will increase, and NPV will decrease. Conversely, if non-mate pairs are more common, false positives will be relatively more common, NPV will increase, and PPV will decrease. The prior prevalence of mated pair comparisons varies substantially among organizations, by case type, and by how candidates are selected. Mated pair comparisons are far more prevalent in cases where the candidates are suspects determined by non-fingerprint means than in cases where candidates were selected by an AFIS. An AFIS search is much more likely to return mated candidates for highly recidivist crimes, such as bank fraud, than when screening job applicants or travelers at border crossings.

Some sources use the term “false discovery rate,” which is equal to 1-PPV (6).

---

## 10 Exclusion decisions

Exclusion decisions were more often correct when the latent image was VID ( $NPV_{\text{VID},59\%}=89\%$ ) than when the latent image was VEO ( $NPV_{\text{VID},59\%}=67\%$ ) (Fig S7D). This is not due to a difference in error rate on mated pairs, but primarily to a difference in conclusion rates on both mated and non-mated pairs (Fig S7).

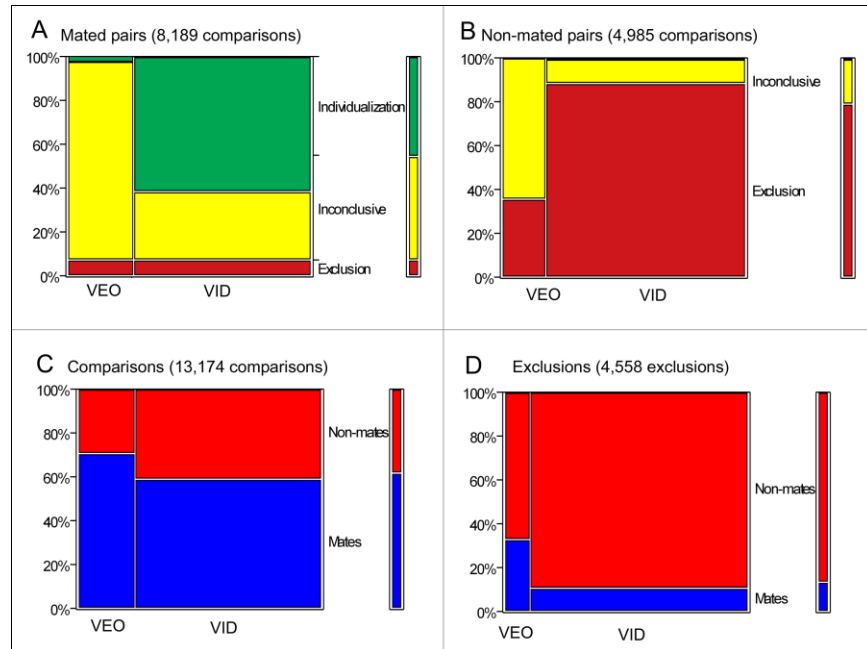

Fig. S7: Relation between latent value decisions and erroneous exclusions. The percentage of exclusions that were erroneous was 33% when latent was VEO vs. 11% when the latent was VID (D). This effect arises from differences in image pair sufficiency between mated and non-mate pairs (A and B), not from different error rates on mated pairs according to the value of the latent images (A).

After an examiner has made an exclusion decision, additional information is available to assess the posterior probability that the decision is erroneous (i.e., the image pair is mated) (Fig. S7). Note that these proportions reflect the prior probabilities inherent in this test design: 62% of test responses were on mated image pairs; and the mated pairs included a greater proportion of poor quality prints than the non-mated pairs.

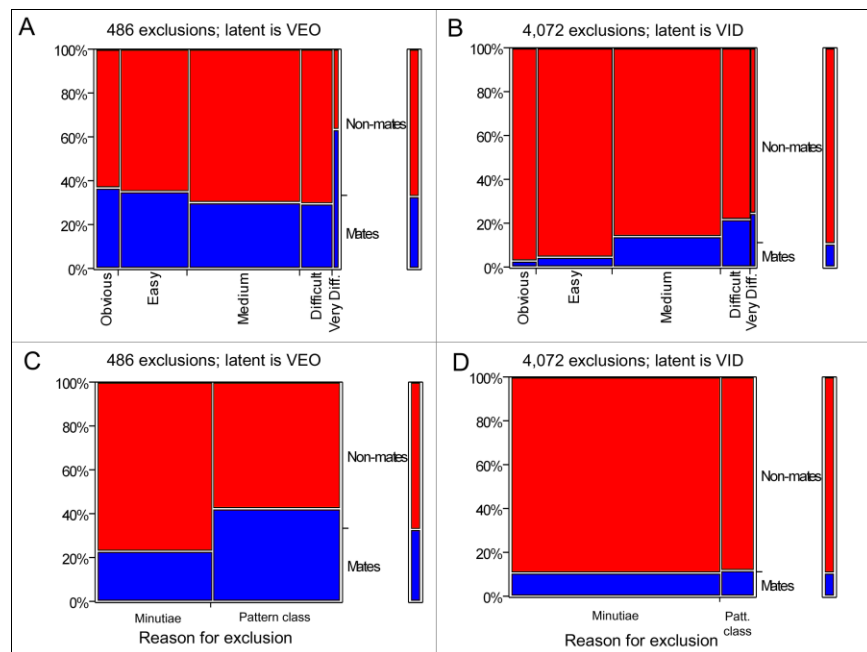

Fig. S9: Posterior probabilities for exclusion decisions depending on exclusion difficulty (from obvious to very difficult), and exclusion reason (minutiae, pattern class). NPV was much higher when latent was VID (B & D; n=4,072 exclusions) than when latent was VEO (A & C; n=486 exclusions). When latent was VID, error rate increased with comparison difficulty (B). Whether the exclusion decision was based on minutiae or pattern class was not a useful

indicator of errors when the latent was VID (D); when the latent was VEO, a greater proportion of erroneous exclusion decisions were based on pattern class (rather than minutiae) as the reason for the exclusion (C).

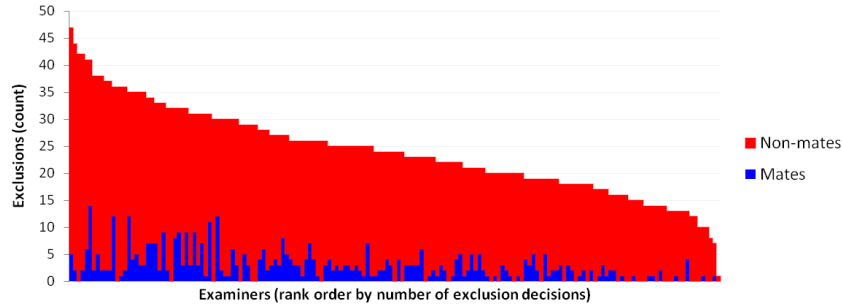

Fig. S10: Exclusion decisions, by examiner (4,072 exclusions by 169 examiners). NPV<sub>VID</sub> varied by examiner from 100% to 60%.

## 11 Verification of exclusions

We were interested in the potential operational benefits of blind verification of exclusions. According to SWGFAST guidelines (1), verification is optional for exclusion decisions.

We considered the probability ( $p_v$ ) that two randomly selected examiners would both exclude under the following assumptions: a mated image pair is selected at random; all casework is performed redundantly by two examiners.

The mean exclusion rate for a randomly selected mated image pair was 5.35%. This is the expected exclusion rate without verification. If exclusions were equally likely for all image pairs (independence assumption), we would estimate that exclusions by two examiners would occur at the rate  $p_v = 5.35\% \times 5.35\% = 0.29\%$ . However, the data shows that the independence assumption is not valid: some mated pairs are more likely to be excluded than others. We use the following method to revise our estimate taking into account the fact that the outcomes of blind verifications are not statistically independent, but depend on the image pairs. By this method, we estimate  $p_v = 0.85\%$ .

Let  $p_i$  be the false negative rate for mated pair  $i$ . We estimate this as  $\hat{p}_i = k_i/n_i$  where  $k_i$  is the observed number of false negatives on this pair, and  $n_i$  is the number of presentations of this pair. We estimate the probability that two examiners both exclude this mated pair,  $p_i^2$  as  $k_i^2/n_i^2 - (k_i/n_i * (1-k_i/n_i))/n_i$ . That is, we use  $(k_i/n_i * (1-k_i/n_i))/n_i$  as an estimate of variance( $p_i$ ) to correct the biased estimator  $k_i^2/n_i^2$ . We then average these estimates of  $p_i^2$  over all mated pairs ( $m=520$ ) in our test data:

$$\left( \sum_{i=1}^m k_i^2 / n_i^2 - (k_i / n_i \times (1 - k_i / n_i)) / n_i \right) / m$$

This models a scenario where all casework is performed redundantly by two examiners and (impractically) presumes that the true mating of image pairs is known. However, it provides a rough estimate of the benefits of exclusion verifications considering the lack of independence inherent in blind verification.

## 12 Glossary/Acronyms

This section defines terms and acronyms as they are used in this paper.

|                      |                                                                                                                                                                                                                                                                                                                                                                                                                                                                                                                                                                                                              |
|----------------------|--------------------------------------------------------------------------------------------------------------------------------------------------------------------------------------------------------------------------------------------------------------------------------------------------------------------------------------------------------------------------------------------------------------------------------------------------------------------------------------------------------------------------------------------------------------------------------------------------------------|
| ACE                  | The stages of ACE-V prior to verification: Analysis, Comparison, Evaluation                                                                                                                                                                                                                                                                                                                                                                                                                                                                                                                                  |
| ACE-V                | The prevailing method for latent print examination: Analysis, Comparison, Evaluation, Verification                                                                                                                                                                                                                                                                                                                                                                                                                                                                                                           |
| AFIS                 | Automated Fingerprint Identification System                                                                                                                                                                                                                                                                                                                                                                                                                                                                                                                                                                  |
| blind verification   | The independent examination of one or more impressions by another competent examiner who has no expectation or knowledge of the conclusions of the original examiner.                                                                                                                                                                                                                                                                                                                                                                                                                                        |
| CMP                  | Abbreviation for “comparisons”: used as a subscript to indicate that a rate (percentage) was computed as a proportion of all comparisons performed, including both those where the latent was VEO and VID (omitting NV latents).                                                                                                                                                                                                                                                                                                                                                                             |
| CR                   | Conclusion Rate: the percentage of individualization or exclusion conclusions (as opposed to no value or inconclusive decisions)                                                                                                                                                                                                                                                                                                                                                                                                                                                                             |
| exclusion            | The comparison/evaluation decision that two fingerprints did not come from the same finger. (Note: for our purposes, this is <i>exclusion of source</i> , which means the two impressions originated from different sources of friction ridge skin, but the subject cannot be excluded, whereas <i>exclusion of subject</i> means the two impressions originated from different subjects.)                                                                                                                                                                                                                   |
| exemplar             | Fingerprint from a known source                                                                                                                                                                                                                                                                                                                                                                                                                                                                                                                                                                              |
| false discovery rate | The percentage of individualization decisions that are false positives (i.e., made on non-mated image pairs). Equal to $1 - PPV$ .                                                                                                                                                                                                                                                                                                                                                                                                                                                                           |
| false negative       | An erroneous exclusion of a mated image pair by an examiner.                                                                                                                                                                                                                                                                                                                                                                                                                                                                                                                                                 |
| false positive       | An erroneous individualization of a non-mated image pair by an examiner.                                                                                                                                                                                                                                                                                                                                                                                                                                                                                                                                     |
| FNR                  | False negative rate: percentage of mated image pairs that resulted in (erroneous) exclusion decisions. This rate may be computed over various subsets of the data:<br>$FNR_{VID} = \frac{\# \text{false negatives with VID latents}}{\# \text{comparisons with VID latents}} \text{ \{ omits VEO and NV latents \}}$ $FNR_{CMP} = \frac{\# \text{false negatives with VEO or VID latents}}{\# \text{comparisons with VEO or VID latents}} \text{ \{ omits NV latents \}}$ $FNR_{PRES} = \frac{\# \text{false negatives}}{\# \text{comparisons}} \text{ \{ includes VID, VEO, and NV latents \}}$             |
| FPR                  | False positive rate: percentage of non-mated image pairs that resulted in (erroneous) individualization decisions. This rate may be computed over various subsets of the data:<br>$FPR_{VID} = \frac{\# \text{false positives with VID latents}}{\# \text{comparisons with VID latents}} \text{ \{ omits VEO and NV latents \}}$ $FPR_{CMP} = \frac{\# \text{false positives with VEO or VID latents}}{\# \text{comparisons with VEO or VID latents}} \text{ \{ omits NV latents \}}$ $FPR_{PRES} = \frac{\# \text{false positives}}{\# \text{comparisons}} \text{ \{ includes VID, VEO, and NV latents \}}$ |
| IAFIS                | The FBI’s Integrated Automated Fingerprint Identification System                                                                                                                                                                                                                                                                                                                                                                                                                                                                                                                                             |
| IAI                  | International Association for Identification                                                                                                                                                                                                                                                                                                                                                                                                                                                                                                                                                                 |
| inconclusive         | The comparison/evaluation decision that neither individualization nor exclusion is possible                                                                                                                                                                                                                                                                                                                                                                                                                                                                                                                  |



|                   |                                                                                                                                                                                                                                                                    |
|-------------------|--------------------------------------------------------------------------------------------------------------------------------------------------------------------------------------------------------------------------------------------------------------------|
| individualization | The comparison/evaluation decision that two fingerprints originated from the same finger                                                                                                                                                                           |
| latent            | Latent fingerprint                                                                                                                                                                                                                                                 |
| mated             | A pair of images (latent and exemplar) known <i>a priori</i> to derive from impressions of the same source (finger)                                                                                                                                                |
| NRC               | National Research Council of the National Academies                                                                                                                                                                                                                |
| non-mated         | A pair of images (latent and exemplar) known <i>a priori</i> to derive from impressions of different sources (different fingers and/or different subjects)                                                                                                         |
| NPV               | Negative predictive value: the percentage of exclusion decisions that are true negatives (i.e., made on non-mated image pairs).                                                                                                                                    |
| NV                | The impression is not of value for individualization, and contains no usable friction ridge information. See also VEO, VID.                                                                                                                                        |
| PPV               | Positive predictive value: the percentage of individualization decisions that are true positives (i.e., made on mated image pairs). Equal to 1 – false discovery rate.                                                                                             |
| PRES              | Abbreviation for presentation: used as a subscript to indicate that a rate (percentage) was computed as a proportion of all presentations (including those where no comparison was performed). Includes NV, VEO, and VID latents.                                  |
| SWGFAST           | Scientific Working Group on Friction Ridge Analysis, Study and Technology                                                                                                                                                                                          |
| TNR               | True negative rate: percentage of non-mated image pairs that resulted in exclusion decisions. Also known as Specificity.                                                                                                                                           |
| TPR               | True positive rate: percentage of mated image pairs that resulted in individualization decisions. Also known as Sensitivity.                                                                                                                                       |
| true negative     | The exclusion of a non-mated image pair by an examiner.                                                                                                                                                                                                            |
| true positive     | The individualization of a mated image pair by an examiner.                                                                                                                                                                                                        |
| VEO               | Decision based on the analysis of a latent that the impression is of value for exclusion only, and contains some friction ridge information that may be appropriate for exclusion if an appropriate exemplar is available. Only applies to latents deemed not VID. |
| verification      | The final stage of ACE-V: the review and analysis by a subsequent examiner of the conclusion of an original examiner. See also Blind verification.                                                                                                                 |
| VID               | Decision based on the analysis of a latent that the impression is of value and is appropriate for potential individualization if an appropriate exemplar is available.                                                                                             |

---

### **References for Supporting Information Appendix**

- 1 SWGFAST (2001) Friction ridge examination methodology for latent print examiners. Ver.1.01.
- 2 ANSI/NIST (2011) Data format for the interchange of fingerprint, facial & other biometric information. ANSI/NIST-ITL 1-2011 (Draft).
- 3 SWGFAST (2010) Standards for examining friction ridge impressions and resulting conclusions. Ver.1.0 (Draft for comment).
4. FBI Criminal Justice Information Services (1997) Wavelet scalar quantization (WSQ) gray-scale fingerprint image compression specification. Ver.3.

5. Tabassi E, Wilson C, Watson C (2004) Fingerprint image quality. NIST Interagency Report 7151.
6. Koehler JJ (2008) Fingerprint error rates and proficiency tests: what they are and why they matter. *Hastings Law J.* **59 (5)**, 1077-1110.
